# Supplementary material for: High-performance anion exchange membrane alkaline seawater electrolysis
Source: Royal Society of Chemistry journal article supplement (doi:10.1039/d0ta12336f), 2021-01-01
Supplement: d0ta12336f1.pdf [file d0ta12336f1.pdf]

Supplementary Information

# High-performance anion exchange membrane alkaline seawater electrolysis

Yoo Sei Park,<sup>‡ab</sup> Jooyoung Lee,<sup>‡a</sup> Myeong Je Jang,<sup>a</sup> Juchan Yang,<sup>a</sup> Jaehoon Jeong,<sup>a</sup> Jaeho Park,<sup>a</sup> Yangdo Kim,<sup>b</sup> Min Ho Seo,<sup>\*c</sup> Zhongwei Chen,<sup>\*d</sup> and Sung Mook Choi<sup>\*a</sup>

AUTHOR ADDRESS.

<sup>a</sup>Materials Center for Energy Convergence, Surface Technology Division, Korea Institute of Materials Science, Changwon, 642831, Republic of Korea.

<sup>b</sup>Department of Materials Science and Engineering, Pusan National University, Busan 46241, Republic of Korea.

<sup>c</sup>Fuel Cell Research and Demonstration Center, Future Energy Research Division, Korea Institute of Energy Research, Buan-gun 56332, Republic of Korea

<sup>d</sup>Department of Chemical Engineering, University of Waterloo, Waterloo, Ontario, N2L 3G1 Canada

<sup>e</sup>These authors contributed equally: Yoo Sei Park, Jooyoung Lee.

\*E-mail: foifrit@kier.re.kr; zhwchen@uwaterloo.ca; akzaky@kims.re.kr

KEYWORDS : anion exchange membrane water electrolysis; alkaline seawater electrolysis; hydrogen energy; seawater electrolysis;

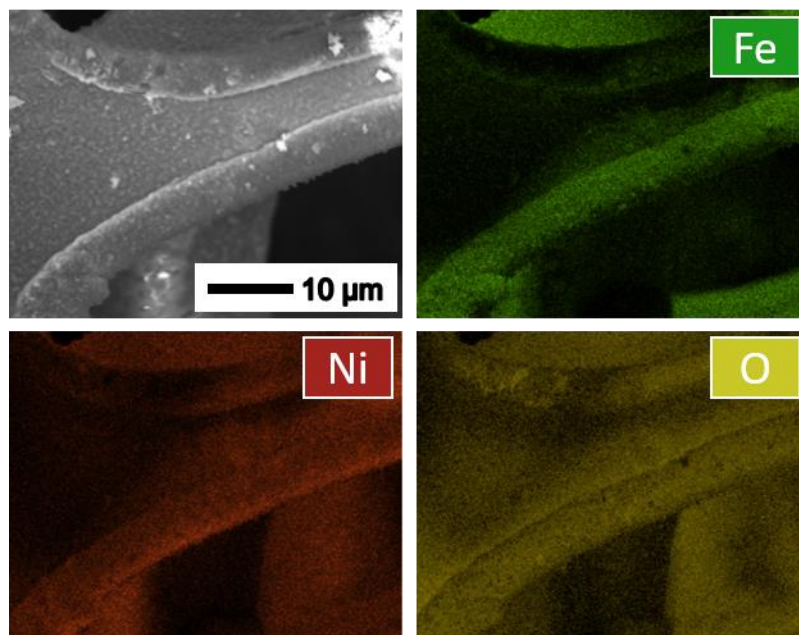

**Figure S1.** EDS elemental maps of Ni-doped FeOOH.

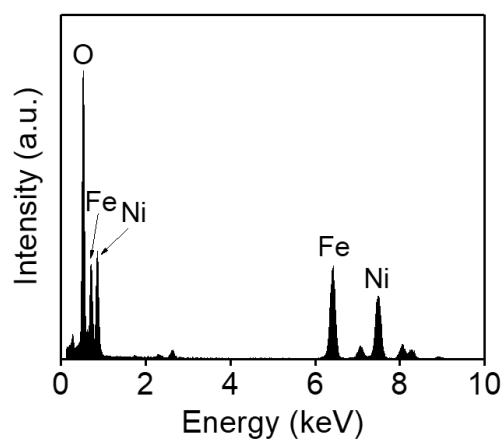

**Figure S2.** EDS spectra of Ni-doped FeOOH.

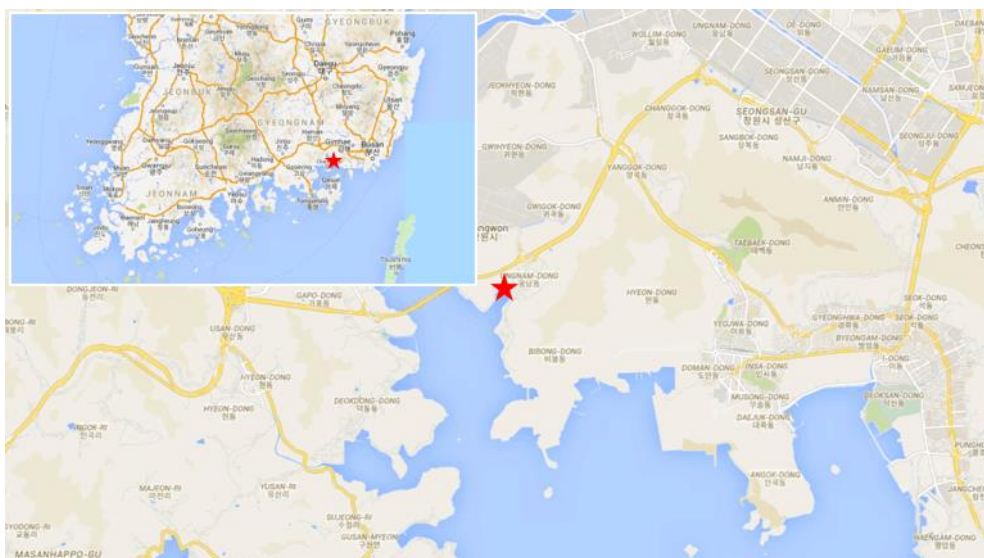

**Figure S3.** Location of seawater sampling. The seawater was obtained from Changwon city in Republic of Korea.

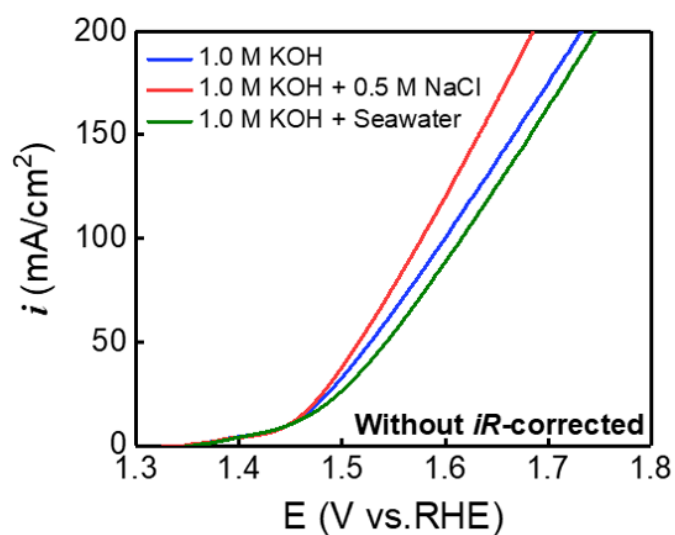

**Figure S4.**  $iR$ -uncorrected polarization curves of the Ni-doped FeOOH with different electrolytes: 1 M KOH (blue), 1 M KOH + 0.5 M NaCl (red), and 1 M KOH + seawater (green).

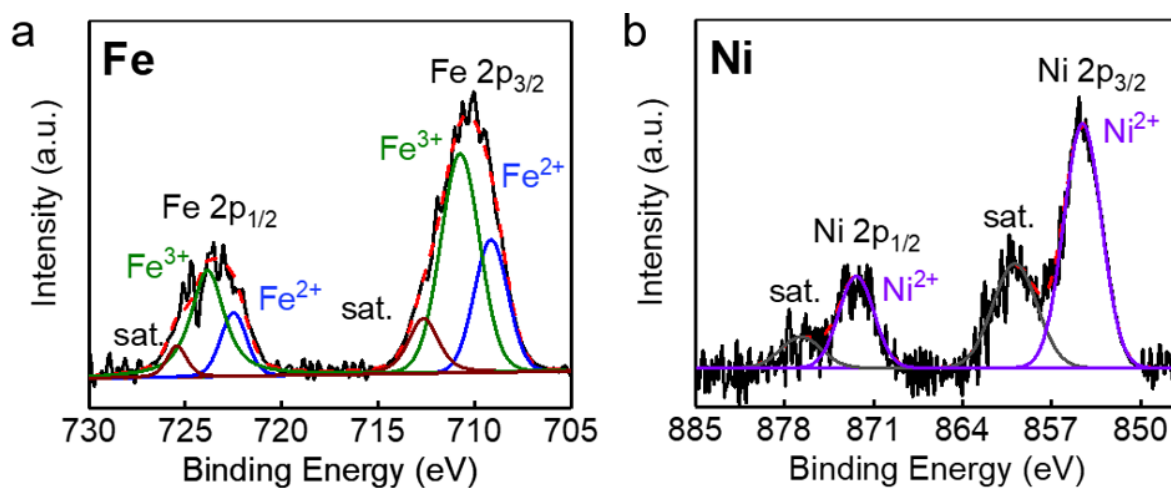

**Figure S5.** XPS analysis of Ni-doped FeOOH after the stability test in 1M KOH + seawater: (a) Fe 2p and (b) Ni 2p.

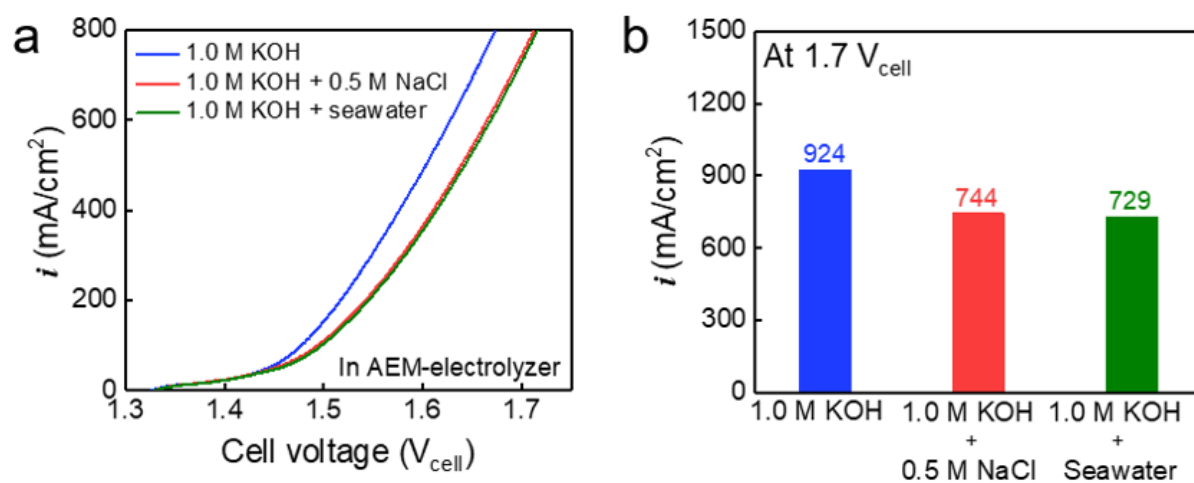

**Figure S6.** (a) Performance of AEM electrolyzer catalyzed by Ni-doped FeOOH in different electrolytes. (b) Comparison of performance at 1.7 V<sub>cell</sub>.

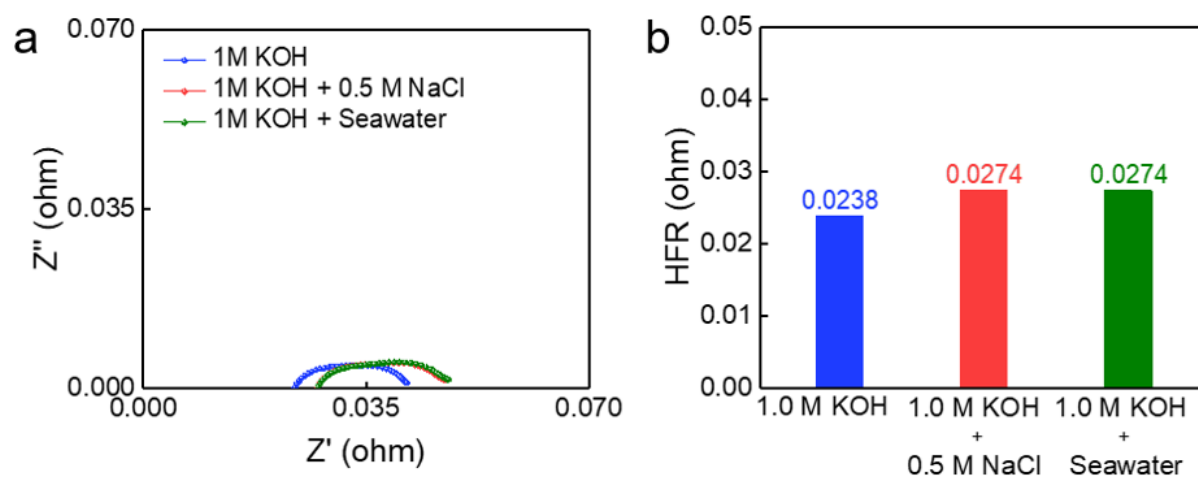

**Figure S7.** (a) Nyquist plots of AEM electrolyzer catalyzed by Ni-doped FeOOH in different electrolyte. (b) High-frequency resistance of AEM electrolyzer.



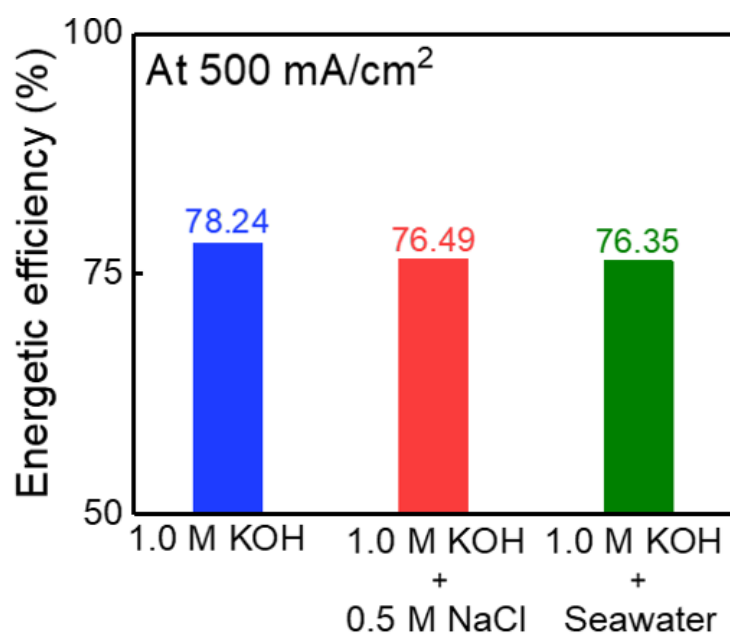

**Figure S8.** Cell efficiency of AEM electrolyzer catalyzed by Ni-doped FeOOH in different electrolytes at 500 mA/cm<sup>2</sup>.

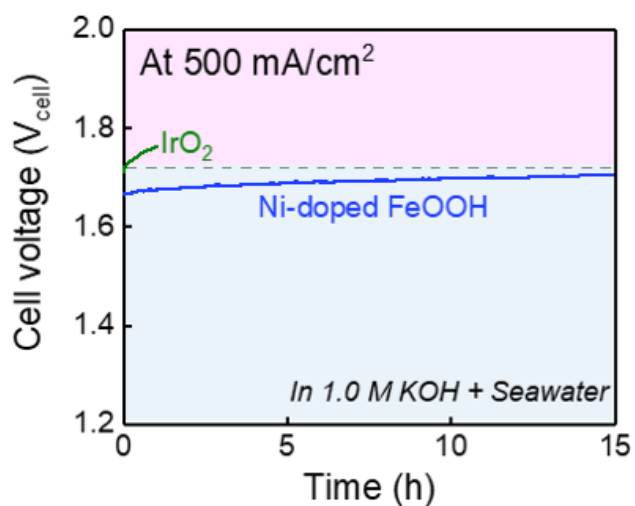

**Figure S9.** Durability of AEM electrolyzers catalysed Ni-doped FeOOH and IrO<sub>2</sub> at 500 mA/cm<sup>2</sup>. The light blue region represents 1.72 V<sub>cell</sub> or less, and the pink region represents 1.72 V<sub>cell</sub> or more.

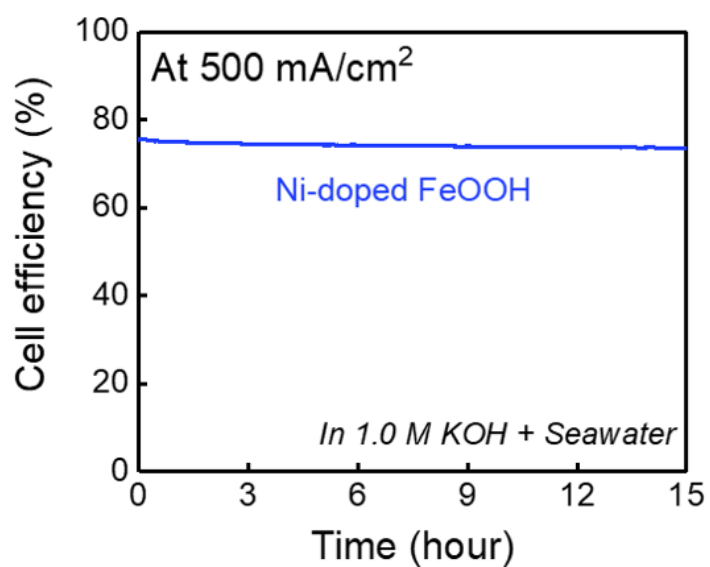

**Figure S10.** Cell efficiency of AEM electrolyzer catalyzed by Ni-doped FeOOH in alkaline seawater at 500 mA/cm<sup>2</sup> during 15 h.
